# Supplementary material for: Eph-ephrin signaling couples endothelial cell sorting and arterial specification
Source: PubMed Central journal article supplement (PMC10991410; doi:10.1038/s41467-024-46300-0), 2024-04-03
Supplement: 41467_2024_46300_MOESM3_ESM.pdf [file 41467_2024_46300_MOESM3_ESM.pdf]

## Description of Additional Supplementary Files

File Name: Supplementary Movie 1

Description: Migration of *siControl* HUVECs exposed to arterial flow. Migration tracks indicate cell migrating with (purple) or against flow (yellow).

File Name: Supplementary Movie 2

Description: Migration of *siEPHB4* HUVECs exposed to arterial flow. Migration tracks indicate cell migrating with (purple) or against flow (yellow).

File Name: Supplementary Movie 3

Description: Migration of *siEPHB4* + *siDACHI* HUVECs exposed to arterial flow. Migration tracks indicate cell migrating with (purple) or against flow (yellow).
